# Supplementary material
Source: PubMed Central journal article supplement (PMC4579439)
Supplement: AEM.02076-15_zam999116649so1.pdf [file AEM.02076-15_zam999116649so1.pdf]

NCBI number access of reference sequences

|         |                                                                                                                                                                                                                                                                                                                                                                                                                                                                                                                                                                                                                                                                                                    |
|---------|----------------------------------------------------------------------------------------------------------------------------------------------------------------------------------------------------------------------------------------------------------------------------------------------------------------------------------------------------------------------------------------------------------------------------------------------------------------------------------------------------------------------------------------------------------------------------------------------------------------------------------------------------------------------------------------------------|
| HAstV   | AB025806.1, AB037274.1, AF248738.2, AF260508.1, AY720891.1, AY720892.1, DQ028633.1, DQ070852.1, DQ344027.1, EF583300.1, FJ755405.1, GQ495608.1, GQ901902.2, GU732187.1, HM237363.1, HQ398856.2, JF491430.1, JN887820.1, JQ403108.1, JX087964.1, KF039910.1, KF039911.1, KF039913.1, KF211475.1, L23513.1, Y08632.2, Z46658.1, Z66541.1                                                                                                                                                                                                                                                                                                                                                             |
| NoV GI  | KF039737.1, KF429789.1, KF429783.1, KF429774.1, KF429773.1, KF429761.1, KF429770.1, JX023285.1, KF306212.1, FJ515294.1, JN699050.1, JN699048.1, JQ743330.1, JN603244.1, JN183164.1, FJ711164.1, JN603273.1, JN603266.1, JN603259.1, JN603245.1, KJ402295.1, JN699046.1, KC998959.1, JN699045.1, JN222366.1, JQ388274.1, JN899243.1, JN183161.1, JN005886.1, GU299761.1, EU003970.1, KF586508.1, KF586507.1, JN183159.1                                                                                                                                                                                                                                                                             |
| NoV GII | KC597151.1, KF429786.1, KF429764.1, JN797508.1, KJ407074.2, KC464505.1, JX846925.1, KC597138.1, KF429769.1, AB662863.1, KP064097.1, KF306213.1, JX846924.1, KC597140.1, KC597144.1, KF712510.1, KC175323.1, JX989074.1, KM272334.1, GU325839.2, JN699044.1, KJ407072.2, JX989075.1, KC832474.1, KF006266.1, JN699042.1, JF802498.1, JX846926.1, GU131223.1, EU494708.1, JX416401.1, KM349447.1, EU448331.1, EU448332.1, KP064099.1, KJ938995.1, AB810014.1, JX439807.1, JN899242.1, GU594162.1, GU017903.2, HM635108.1, KC207117.1, AB810002.1, KJ156329.1, KC597139.1, JN699043.1, EU448333.1, GQ149616.1, JX047017.1, JN899245.1, JF300333.1, HV321704.1, AB542917, EU373815, AY675554, AB542915 |

Table S 1: Reference sequences for HAstV, NoV GI and NoV GII used to OTUs identification.

| Virus  | Genotype  | Number of identified acute gastroenteritis cases |        |        |        | Total |
|--------|-----------|--------------------------------------------------|--------|--------|--------|-------|
|        |           | Spring                                           | Summer | Autumn | Winter |       |
| HAstV  | 1         | 2                                                | 0      | 0      | 0      | 2     |
|        | 2         | 1                                                | 0      | 0      | 3      | 4     |
|        | 5         | 5                                                | 0      | 1      | 0      | 6     |
|        | Untypable | 1                                                | 1      | 0      | 1      | 3     |
|        | Total     | 9                                                | 1      | 1      | 4      | 15    |
| NoV GI | I.1       | 1                                                | 0      | 0      | 0      | 1     |
|        | I.2       | 1                                                | 0      | 0      | 2      | 3     |

|         |            |    |    |    |    |     |
|---------|------------|----|----|----|----|-----|
|         | I.3        | 3  | 2  | 0  | 2  | 7   |
|         | I.4        | 1  | 0  | 0  | 1  | 2   |
|         | I.6        | 0  | 0  | 0  | 1  | 1   |
|         | I.8        | 1  | 0  | 0  | 0  | 1   |
|         | I.9        | 1  | 0  | 0  | 1  | 2   |
|         | I.b/I.4    | 0  | 0  | 0  | 1  | 1   |
|         | I.b/I.6    | 2  | 2  | 0  | 4  | 8   |
|         | I.f        | 1  | 0  | 0  | 0  | 1   |
|         | Untypable  | 6  | 0  | 1  | 4  | 11  |
|         | Total      | 17 | 4  | 1  | 16 | 38  |
|         | II.c/II.1  | 0  | 0  | 0  | 1  | 1   |
|         | II.2       | 2  | 0  | 2  | 5  | 9   |
|         | II.e/II.2  | 1  | 0  | 0  | 1  | 2   |
|         | II.3       | 0  | 0  | 0  | 1  | 1   |
|         | II.4 2006a | 2  | 1  | 0  | 1  | 4   |
|         | II.4 2006b | 2  | 0  | 0  | 1  | 3   |
|         | II.4 2009  | 5  | 2  | 3  | 4  | 14  |
|         | II.4 2012  | 36 | 12 | 15 | 68 | 131 |
| NoV GII | II.6       | 12 | 1  | 11 | 18 | 42  |
|         | II.7       | 0  | 2  | 1  | 1  | 4   |
|         | II.10      | 0  | 1  | 0  | 0  | 1   |
|         | II.16      | 0  | 1  | 0  | 0  | 1   |
|         | II.7/II.6  | 0  | 1  | 1  | 2  | 4   |
|         | II.g/II.12 | 1  | 1  | 1  | 2  | 5   |
|         | II.14      | 0  | 1  | 1  | 0  | 2   |
|         | II.17      | 3  | 0  | 0  | 1  | 4   |
|         | II.21/II.3 | 4  | 1  | 2  | 3  | 10  |

|           |    |    |    |     |     |
|-----------|----|----|----|-----|-----|
| Untypable | 2  | 3  | 3  | 10  | 18  |
| Total     | 70 | 27 | 40 | 119 | 256 |

Table S 2: Number of identified acute gastroenteritis cases whose origin is linked to AstV, NoV GI and NoV GII in France between May 2013 and May 2014.

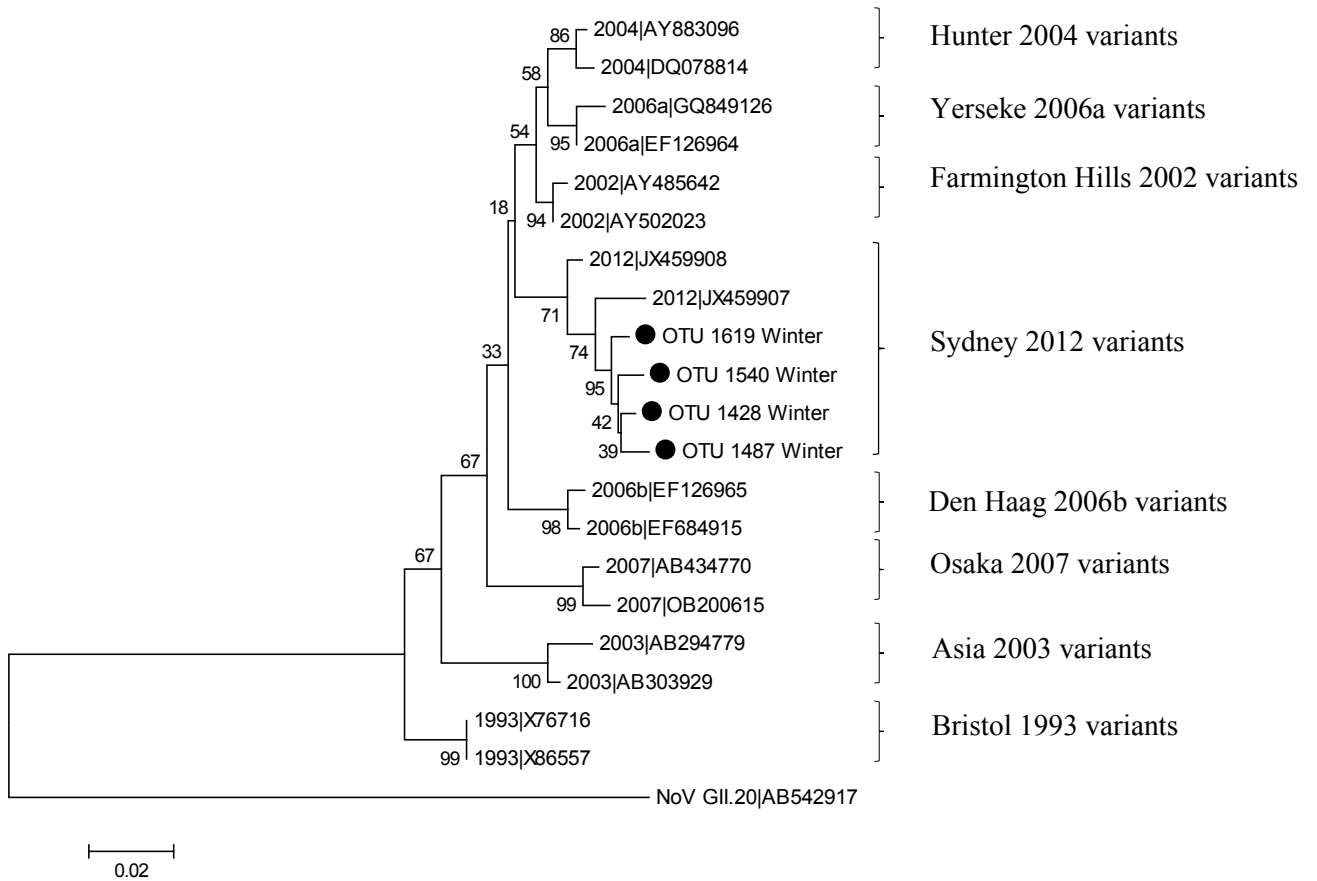

Figure S 1: Phylogenetic trees based on nucleotide sequences (302 nucleotides) of NoV GII.4 variants. The trees were constructed by the neighbor-joining method. Numbers of each branch indicate the bootstrap values obtained from 1000 replicates. Sequences. ● represents 4 major OTUs in winter.
